# Supplementary material
Source: Elsevier journal article supplement (https://pure.mpg.de/pubman/item/item_2291706_8/component/file_2291708/mmc1.pdf?mode=download)
Supplement: mmc1 [file mmc1.pdf]

## Supplementary Material

Investigating the Relationship between Breeding and Welfare in Captive Chimpanzees (*Pan troglodytes*).

Katherine A. Cronin, Victoria West & Stephen R. Ross

### Results of the Linear Mixed Effects Models.

#### Model 1a. Weekly rate of abnormal or stress-related behaviours

Reference category for variable Reproductive Category is *without* dependent young.

##### Random effects

|                          | Variance | Standard Deviation |
|--------------------------|----------|--------------------|
| Focal (Intercept)        | 0.00372  | 0.06099            |
| Social Group (Intercept) | 0.00000  | 0.00000            |
| Residual                 | 0.01086  | 0.10419            |

##### Fixed Effects

|                       | Estimate  | Standard Error | t value |
|-----------------------|-----------|----------------|---------|
| (Intercept)           | 0.031356  | 0.014408       | 2.176   |
| Reproductive Category | -0.005174 | 0.026188       | -0.198  |
| Mean Centered Age     | 0.001466  | 0.001597       | 0.918   |

#### Model 1b. Weekly rate of play

Reference category for variable Reproductive Category is *without* dependent young.

##### Random effects

|                          | Variance  | Standard Deviation |
|--------------------------|-----------|--------------------|
| Focal (Intercept)        | 3.685e-05 | 0.00607            |
| Social Group (Intercept) | 0.00000   | 0.00000            |
| Residual                 | 1.466e-03 | 0.03829            |

##### Fixed Effects

|                       | Estimate   | Standard Error | t value |
|-----------------------|------------|----------------|---------|
| (Intercept)           | 0.0066238  | 0.0031283      | 2.117   |
| Reproductive Category | -0.0017561 | 0.0057049      | -0.308  |
| Mean Centered Age     | 0.0004048  | 0.0003497      | 1.158   |

#### Model 1c. Response to social challenge

Reference category for variable Reproductive Category is *without* dependent young.

##### Random effects

|                          | Variance  | Standard Deviation |
|--------------------------|-----------|--------------------|
| Focal (Intercept)        | 1.155e-05 | 0.003398           |
| Social Group (Intercept) | 0.00000   | 0.00000            |
| Residual                 | 4.630e-04 | 0.021519           |

##### Fixed Effects

|                       | Estimate   | Standard Error | t value |
|-----------------------|------------|----------------|---------|
| (Intercept)           | 0.0075747  | 0.0017150      | 4.417   |
| Reproductive Category | -0.0025240 | 0.0029668      | -0.851  |
| Mean Centered Age     | 0.0003069  | 0.0001917      | 1.601   |

#### Model 2a. Weekly rate of abnormal or stress-related behaviours

| Random effects           |          |                    |         |
|--------------------------|----------|--------------------|---------|
|                          | Variance | Standard Deviation |         |
| Focal (Intercept)        | 0.003663 | 0.06052            |         |
| Social Group (Intercept) | 0.00000  | 0.00000            |         |
| Residual                 | 0.010838 | 0.10411            |         |
| Fixed Effects            |          |                    |         |
|                          | Estimate | Standard Error     | t value |
| (Intercept)              | 0.013771 | 0.020724           | 0.664   |
| Proximity to Young       | 0.037130 | 0.040022           | 0.928   |
| Mean Centered Age        | 0.001706 | 0.001534           | 1.112   |

### **Model 2b. Weekly rate of play**

| Random effects           |           |                    |         |
|--------------------------|-----------|--------------------|---------|
|                          | Variance  | Standard Deviation |         |
| Focal (Intercept)        | 2.936e-05 | 0.005419           |         |
| Social Group (Intercept) | 0.00000   | 0.00000            |         |
| Residual                 | 1.469e-03 | 0.038323           |         |
| Fixed Effects            |           |                    |         |
|                          | Estimate  | Standard Error     | t value |
| (Intercept)              | 0.0028474 | 0.0044117          | 0.645   |
| Proximity to Young       | 0.0077479 | 0.0087520          | 0.885   |
| Mean Centered Age        | 0.0004675 | 0.0003330          | 1.404   |

### **Model 2c. Response to social challenge**

| Random effects           |           |                    |         |
|--------------------------|-----------|--------------------|---------|
|                          | Variance  | Standard Deviation |         |
| Focal (Intercept)        | 1.253e-05 | 0.00354            |         |
| Social Group (Intercept) | 0.00000   | 0.00000            |         |
| Residual                 | 4.633e-04 | 0.02152            |         |
| Fixed Effects            |           |                    |         |
|                          | Estimate  | Standard Error     | t value |
| (Intercept)              | 0.0061907 | 0.0025159          | 2.461   |
| Proximity to Young       | 0.0010838 | 0.0044629          | 0.243   |
| Mean Centered Age        | 0.0003480 | 0.0001882          | 1.849   |
